# Supplementary material for: All-Cellulose Composites: A Review of Recent Studies on Structure, Properties and Applications
Source: PubMed Central journal article supplement (PMC7356676; doi:10.3390/molecules25122836), 2020-06-19
Supplement: molecules-25-02836-s001.pdf [file molecules-25-02836-s001.pdf]

**Table 1.** Literature survey of reported tensile properties of various ACCs.

| Tensile Strength (MPa) | Young's Modulus (GPa) | Sample | Reference                                                                                                                                |
|------------------------|-----------------------|--------|------------------------------------------------------------------------------------------------------------------------------------------|
| 480                    | 45                    | 1      | All-Cellulose Composite                                                                                                                  |
| 243                    | 15                    | 2      | All-cellulose nanocomposite                                                                                                              |
| 154                    | 12.2                  | 3      | Structure and properties of a pulp fibre-reinforced composite with regenerated cellulose matrix                                          |
| 211                    | 8.2                   | 4      | All-cellulose composite prepared by selective dissolving of fiber surface                                                                |
| 540                    | 25                    | 5      | The effect of fibre volume fraction and mercerization on the properties of all-cellulose composites                                      |
| 460                    | 28                    | 6      | All-cellulose composites by surface selective dissolution of aligned ligno-cellulosic fibres                                             |
| 124                    | 10.8                  | 7      | All-cellulose composites by partial dissolution in the ionic liquid 1-butyl-3-methylimidazolium chloride                                 |
| 124                    | 5                     | 8      | Properties of Films Composed of Cellulose Nanowhiskers and a Cellulose Matrix Regenerated from Alkali/Urea Solution                      |
| 105                    | 6.9                   | 9      | Duchemin et al. (2009) (Structure-property relationship of all cellulose composite)                                                      |
| 350                    | 15                    | 10     | All-cellulose composites of regenerated cellulose fibres by surface selective dissolution                                                |
| 910                    | 23                    | 11     | All-cellulose composites of regenerated cellulose fibres by surface selective dissolution                                                |
| 410                    | 18                    | 12     | All-cellulose nanocomposites by surface selective dissolution of bacterial cellulose                                                     |
| 89                     | 17                    | 13     | Novel all-cellulose eco-composites prepared in ionic liquids                                                                             |
| 74                     | 0.75                  | 14     | Preparation of all-cellulose composite by selective dissolving of cellulose surface in PEG/NaOH aqueous solution                         |
| 76                     | 13                    | 15     | A non-solvent approach for high-stiffness all-cellulose biocomposites based on pure wood cellulose                                       |
| 128.5                  | 4.8                   | 16     | Discrimination of matrix-fibre interactions in all-cellulose nanocomposites                                                              |
| 65                     | 1.5                   | 17     | Self-reinforced cellulose nanocomposites                                                                                                 |
| 52                     | 3.7                   | 18     | Green composite films composed of nanocrystalline cellulose and a cellulose matrix regenerated from functionalized ionic liquid solution |
| 188                    | 17.5                  | 19     | Direct Fabrication of all-Cellulose Nanocomposite from Cellulose Microfibers Using Ionic Liquid-Based Nanowelding                        |
| 140                    | 5.6                   | 20     | Novel all-cellulose composite displaying aligned cellulose nanofibers reinforced with cellulose nanocrystals                             |
| 46                     | 0.86                  | 21     | All-cellulose composite laminates                                                                                                        |
| 70.16                  | 2.45                  | 22     | All-cellulose composite laminates                                                                                                        |
| 78                     | 7.2                   | 23     | All-cellulose composites prepared from flax and lyocell fibres compared to epoxy-matrix composites                                       |
| 175.6                  | 12.5                  | 24     | Influence of Magnetic Field Alignment of Cellulose Whiskers on the Mechanics of All-Cellulose Nanocomposites                             |
| 34                     | 4.6                   | 25     | All-cellulose composites prepared from flax and lyocell fibres compared to epoxy-matrix composites                                       |
| 170                    | 13.6                  | 26     | Orientation and deformation of wet-stretched                                                                                             |
| 165.4                  | 11.8                  | 27     | Deformation micromechanics of all-cellulose nanocomposites: comparing matrix and reinforcing components                                  |
| 137.1                  | 9.8                   | 28     | Deformation micromechanics of all-cellulose nanocomposites: comparing matrix and reinforcing components                                  |

|       |       |    |                                                                                                                                                   |
|-------|-------|----|---------------------------------------------------------------------------------------------------------------------------------------------------|
| 20    | 0.05  | 29 | All-cellulose and all-wood composites by partial dissolution of cotton fabric and wood in ionic liquid                                            |
| 12    | 0.14  | 30 | Properties of All-Cellulose Composite Films from Coconut Shell Powder and Microcrystalline Cellulose                                              |
| 135   | 8.1   | 31 | All-Cellulose Nanocomposites Reinforced with in Situ Retained Cellulose Nanocrystals during Selective Dissolution of Cellulose in an Ionic Liquid |
| 650   | 11    | 32 | All-cellulose composites with ultra-high mechanical properties prepared through using straw cellulose fiber                                       |
| 126.2 | 5.6   | 33 | Production of regenerated nanocomposite fibers based on cellulose and their use in all-cellulose composites                                       |
| 109   | 3.56  | 34 | All-cellulose composite isolated from oil palm empty fruit bunch                                                                                  |
| 140   | 12.8  | 35 | All-cellulose nanocomposite film made from bagasse cellulose nanofibers for food packaging application                                            |
| 16    | 3.8   | 36 | All-cellulose composites from alfa and wood fibers                                                                                                |
| 13.9  | 4.2   | 37 | All-cellulose composites from alfa and wood fibers                                                                                                |
| 144   | 5.5   | 38 | All-Cellulose Composites by Partial Dissolution of Cotton Fibres                                                                                  |
| 77.7  | 7.3   | 39 | Parametric optimization of the processing of allcellulose composite laminae                                                                       |
| 92    | 4     | 40 | Solvent infusion processing of all-cellulose composite material                                                                                   |
| 64.9  | 5.5   | 41 | Potential of all-cellulose composites in corrugated board applications: Comparison of chemical pulp raw materials                                 |
| 45    | 1.7   | 42 | All-cellulose composite laminates with low moisture and water sensitivity                                                                         |
| 167   | 6.2   | 43 | Cellulose nanofibrils improve the properties of all-cellulose composites by the nano-reinforcement mechanism and nanofibril-induced               |
| 44.2  | 1.8   | 44 | Effect of pressure on structure and properties of lyocell fabric-based all-cellulose composite laminates                                          |
| 4.2   | 102.6 | 45 | A comparative study on lyocell-fabric based all-cellulose composite laminates produced by different processes                                     |
